# Supplementary material
Source: PubMed Central journal article supplement (PMC5072410)
Supplement: mol-22-16_068_Amor_Suppl.pdf [file mol-22-16_068_Amor_Suppl.pdf]

Supplemental Data

Identification of Matrix Metalloproteinase-12 as a Candidate Molecule for Prevention and Treatment of Cardiometabolic Disease

Melina Amor,<sup>1\*</sup> Veronica Moreno-Viedma,<sup>1\*</sup> Alisina Sarabi,<sup>1</sup> Nicole G Grün,<sup>1</sup> Bianca Itariu,<sup>1</sup> Lukas Leitner,<sup>1</sup> Irene Steiner,<sup>2</sup> Martin Bilban,<sup>3</sup> Keiichi Kodama,<sup>4</sup> Atul J Butte,<sup>4</sup> Guenther Staffler,<sup>5</sup> Maximilian Zeyda,<sup>6</sup> and Thomas M Stulnig<sup>1\*</sup>

Online address: <http://www.molmed.org>

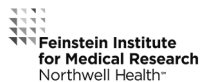

hOPN + +  
hMMP12 + +

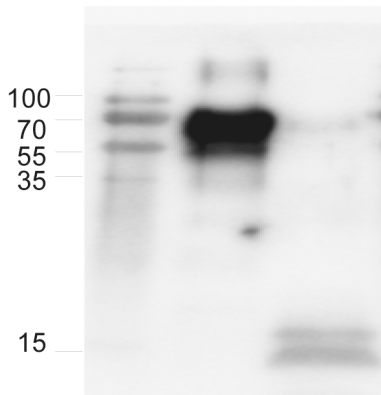

**Supplementary Figure S1.** Enzymatic cleavage of OPN by MMP12. 100µg of human full length OPN (PeproTech) were incubated with 50µg of recombinant MMP12 (R&D) during 4 h. at 37°C. The products from the enzymatic reaction were loaded into a SDS-PAGE and western blot was performed as described in materials and methods. OPN was detected with anti-OPN rabbit polyclonal antibody (Novus). As it is shown in the figure, OPN is cleaved by MMP12 (lane 3).

**Supplementary Table S1.** Human study baseline characteristics.

|                          | Lean <sup>A</sup>       | Obese <sup>A</sup>       | P      |
|--------------------------|-------------------------|--------------------------|--------|
| Age (y)                  | 44.14 + -2.12 (n = 21)  | 42 + -2.38 (n = 21)      | 0.50   |
| BMI <sup>B</sup>         | 24.73 + -0.64 (n = 21)  | 46.42 + -1.53 (n = 21)   | <0.001 |
| WHR <sup>C</sup>         | 0.88 + -0.02 (n = 12)   | 0.93 + -0.02 (n = 21)    | 0.152  |
| Glucose (mg/dl)          | 93.82 + -3.40 (n = 17)  | 91.86 + -2.02 (n = 21)   | 0.623  |
| Insulin (µg/mL)          | 9.08 + -1.98 (n = 18)   | 19.60 + -2.60 (n = 21)   | 0.003  |
| C-Peptide (ng/mL)        | 0.59 + -0.16 (n = 19)   | 3.96 + -0.31 (n = 21)    | <0.001 |
| HOMA IR <sup>D</sup>     | 2.23 + -0.47 (n = 18)   | 4.48 + -0.61 (n = 21)    | 0.006  |
| Creatinine (mg/dl)       | 0.85 + -0.06 (n = 19)   | 0.88 + -0.03 (n = 21)    | 0.636  |
| Triglycerides (mg/dl)    | 142.74 + -16 (n = 19)   | 176.67 + -17.96 (n = 21) | 0.167  |
| Cholesterol (mg/dl)      | 182.26 + -7.71 (n = 19) | 218.57 + -9.39 (n = 21)  | 0.005  |
| Apolipoprotein B (mg/dl) | 95.37 + -6 (n = 19)     | 110.45 + -5.18 (n = 21)  | 0.065  |
| hsCRP (mg/dl)            | 0.46 + -0.27 (n = 18)   | 0.79 + -0.12 (n = 21)    | 0.27   |
| GOT (U/L) <sup>E</sup>   | 27.76 + -3.96 (n = 17)  | 27.50 + -1.60 (n = 20)   | 0.95   |
| GPT (U/L) <sup>F</sup>   | 16.17 + -2.10 (n = 18)  | 39.23 + -4.70 (n = 21)   | <0.001 |
| γ-GT (U/L) <sup>G</sup>  | 28.12 + -5.80 (n = 17)  | 40.90 + -18.00 (n = 20)  | 0.081  |

<sup>A</sup>Data represented by mean ± SEM; <sup>B</sup>Body mass index; <sup>C</sup>Waist-to-hip ratio; <sup>D</sup>Insulin-resistance index; <sup>E</sup>Glutamic oxaloacetic transaminase; <sup>F</sup>Glutamic pyruvic transaminase; <sup>G</sup>γ-glutamyl transferase.

**MMP12 AND CARDIOMETABOLIC DISEASE**

**Supplementary Table S2.** Data sets of 2 sample (case/control) microarray experiments included in the cardiovascular disease meta-analysis study.

|                             | Data set 2<br>(GSE28829) | Data set 4<br>(GSE40231)      | Data set 7<br>(GSE38574)        | Data set 8<br>(GSE18443)    | Data set 9<br>(GSE2372)            | Data set 10<br>(GSE1560)               |
|-----------------------------|--------------------------|-------------------------------|---------------------------------|-----------------------------|------------------------------------|----------------------------------------|
| Number of genes             | 21,187                   | 21,187                        | 16,223                          | 16,585                      | 16,223                             | 14,538                                 |
| Platform                    | Affymetrix U133 Plus 2.0 | Affymetrix U133 Plus 2.0      | Affymetrix Mouse genome 430 2.0 | Rosetta/Merck Mouse 44k 1.0 | Affymetrix Mouse genome 430 2.0    | Agilent 011978 Mouse Microarray G4121A |
| Species                     | Human                    | Human                         | Mouse                           | Mouse                       | Mouse                              | Mouse                                  |
| Original Normalization      | RMA log2 intensities     | RMA intensities               | MAS 5.0 raw intensities         | log10 ratios                | Signal value scaled to 500 by GCOS | log ratio                              |
| Additional preprocessing    | Quantile-normalization   | log2 + quantile normalization | log2 + quantile normalization   | Quantile normalization      | log2 + quantile normalization      | Quantile normalization                 |
| Sample size (case/ control) | 16/ 13                   | 40/ 40                        | 6 / 7                           | 3/ 3                        | 3/ 3                               | 3/ 3                                   |

**Supplementary Table S3.** Data set of 1 sample (cases only) microarray experiments included in the cardiovascular disease meta-analysis study.

|                             | Data set 1 (GDS3698)                            | Data set 3 (GSE21545)     | Data set 5 (GSE2143)                                    | Data set 6 (GSE23314)                                          |
|-----------------------------|-------------------------------------------------|---------------------------|---------------------------------------------------------|----------------------------------------------------------------|
| Number of genes             | 15,109                                          | 21,187                    | 11,765                                                  | 20,158                                                         |
| Platform                    | Micro-CRIBI Human Oligo Array V_0 (Operon V2.0) | Affymetrix U133 Plus 2.0  | Agilent – TQ Cardiovascular Human Oligonucleotide Array | Rosetta/Merck Human RSTA Affymetrix 1.0 microarray, custom CDF |
| Species                     | Human                                           | Human                     | Mouse/Human                                             | Human                                                          |
| Original Normalization      | LOWESS, log2 (Ch1/Ch2)                          | RMA log2 signal intensity | Log2 ratio                                              | RMA                                                            |
| Additional preprocessing    | Quantile normalization                          | Quantile normalization    | Quantile normalization                                  | log2 + quantile normalization                                  |
| Sample size (case/ control) | 22 (cases)                                      | 126 (cases)               | 51 (cases)                                              | 113 (cases)                                                    |

**Supplementary Table S4.** Fold change of the 8 candidate genes in a patient case/control microarray study (GSE28829) included in the cardiovascular disease meta-analysis.

|                        | Fold change      |
|------------------------|------------------|
| <i>MMP12/Mmp12</i>     | 11.6             |
| <i>TREM2/Trem2</i>     | 2.0              |
| <i>MPEG1/Mpeg1</i>     | 2.5 <sup>A</sup> |
| <i>GPR137B/Gpr137b</i> | 1.8              |
| <i>SYK/Syk</i>         | 1.7 <sup>A</sup> |
| <i>MAFB/Mafb</i>       | 2.0 <sup>A</sup> |
| <i>PLTP/Pltp</i>       | 2.8              |
| <i>RRM2/Rrm2</i>       | 2.4 <sup>A</sup> |

<sup>A</sup>Mean of the fold change of all the probe sets present in the Affymetrix U133 Plus 2.0 chip.

**Supplementary Table S5.** Top 10 upregulated genes list from the GWAT microarray.

| Gene name                                                | Gene symbol     | Fold change | Adjusted p value |
|----------------------------------------------------------|-----------------|-------------|------------------|
| <i>ATPase, H + transporting, lysosomal V0 subunit D2</i> | <i>Atp6v0d2</i> | 40.0        | 2.38E-07         |
| <i>Olfactory receptor 111</i>                            | <i>Olf111</i>   | 26.9        | 6.71E-07         |
| <i>Transmembrane 4 L six family member 19</i>            | <i>Tm4sf19</i>  | 26.1        | 6.69E-06         |
| <i>Ring finger protein 128</i>                           | <i>Rnf128</i>   | 23.7        | 8.60E-06         |
| <i>Regulator of G-protein signaling 1</i>                | <i>Rgs1</i>     | 22.3        | 1.26E-05         |
| <i>Glycoprotein (transmembrane) nmb</i>                  | <i>Gpnmb</i>    | 21.8        | 1.15E-07         |
| <i>Integrin <math>\alpha</math> X</i>                    | <i>Itgax</i>    | 21.2        | 2.87E-07         |
| <i>Toll-like receptor 13</i>                             | <i>Tlr13</i>    | 18.5        | 1.17E-06         |
| <i>Secreted phosphoprotein 1/ Osteopontin</i>            | <i>Spp1/OPN</i> | 18.2        | 8.86E-05         |
| <i>Macrophage metalloelastase</i>                        | <i>Mmp12</i>    | 16.9        | 5.45E-07         |

**Supplementary Table S6.** List of upregulated matrix metalloproteinases (MMPs) in the considered studies ordered by expression in the GWAT microarray.

|                    | GWAT microarray<br>(fold change) | Meta-analyses (pVal)   |                 |
|--------------------|----------------------------------|------------------------|-----------------|
|                    | WT (HFD) versus WT (CD)          | Cardiovascular disease | Type 2 diabetes |
| <i>MMP12/Mmp12</i> | 16.9                             | 0.00232                | 0.00077         |
| <i>MMP13/Mmp13</i> | 6.0                              | 0.04091                | -               |
| <i>MMP3/Mmp3</i>   | 5.9                              | -                      | -               |
| <i>MMP2/Mmp2</i>   | 4.0                              | -                      | -               |
| <i>MMP19/Mmp19</i> | 3.0                              | -                      | -               |
| <i>MMP27/Mmp27</i> | 2.3                              | -                      | -               |
| <i>MMP14/Mmp14</i> | 2.2                              | -                      | -               |
| <i>MMP9/Mmp9</i>   | -                                | -                      | 0.00142         |
| <i>MMP7/Mmp7</i>   | -                                | -                      | 0.00061         |
